# Supplementary material for: Time trends in smoking in Russia in the light of recent tobacco control measures: synthesis of evidence from multiple sources
Source: PubMed Central journal article supplement (PMC7092419; doi:10.1186/s12889-020-08464-4), 2020-03-23

**Figure S1 – Trends in education-standardized prevalence of current smoking by age group in RLMS**

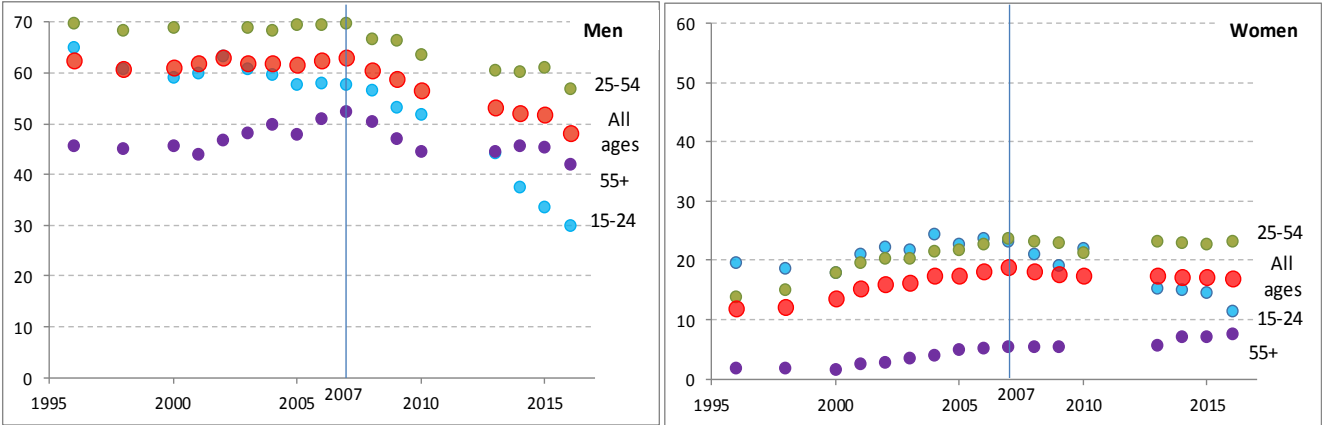

Supplement: 12889_2020_8464_MOESM4_ESM.pdf [file 12889_2020_8464_MOESM4_ESM.pdf]
