# Supplementary material for: Time trends in smoking in Russia in the light of recent tobacco control measures: synthesis of evidence from multiple sources
Source: Springer Nature journal article supplement (doi:10.1186/s12889-020-08464-4), 2020-03-23

**Figure S3 - Educational differences in female smoking (ORs low vs. high) by age group in various surveys**

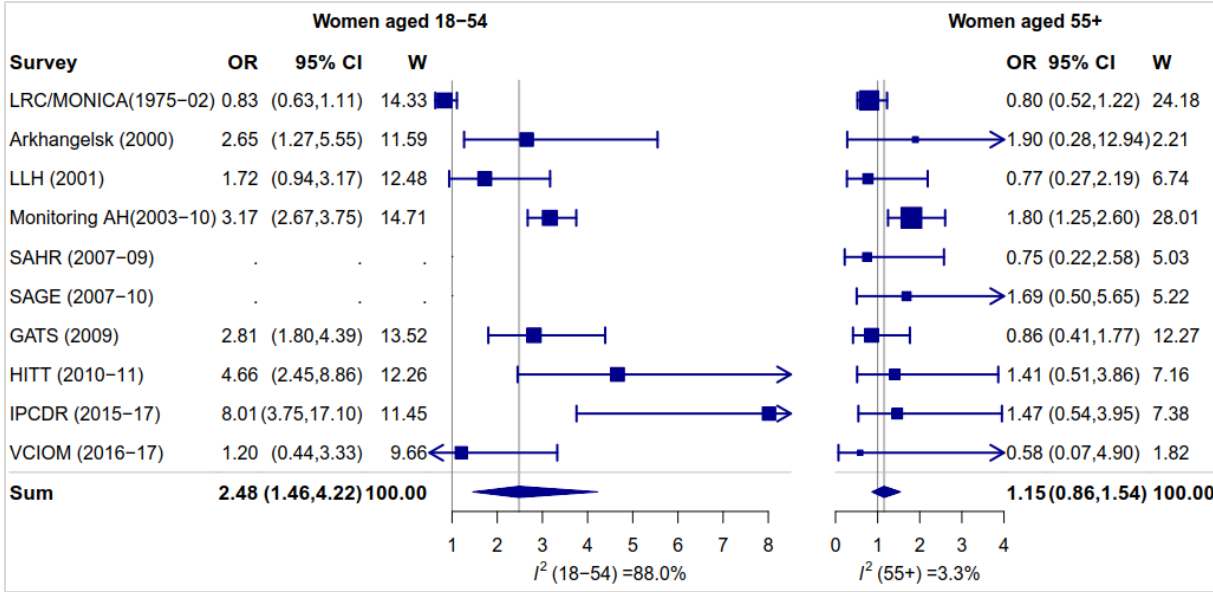

Supplement: 12889_2020_8464_MOESM6_ESM.pdf [file 12889_2020_8464_MOESM6_ESM.pdf]
