# Supplementary material for: Time trends in smoking in Russia in the light of recent tobacco control measures: synthesis of evidence from multiple sources
Source: Springer Nature journal article supplement (doi:10.1186/s12889-020-08464-4), 2020-03-23

**Figure S2 - Educational differences in smoking (ORs low vs. high) adjusted for age in various surveys**

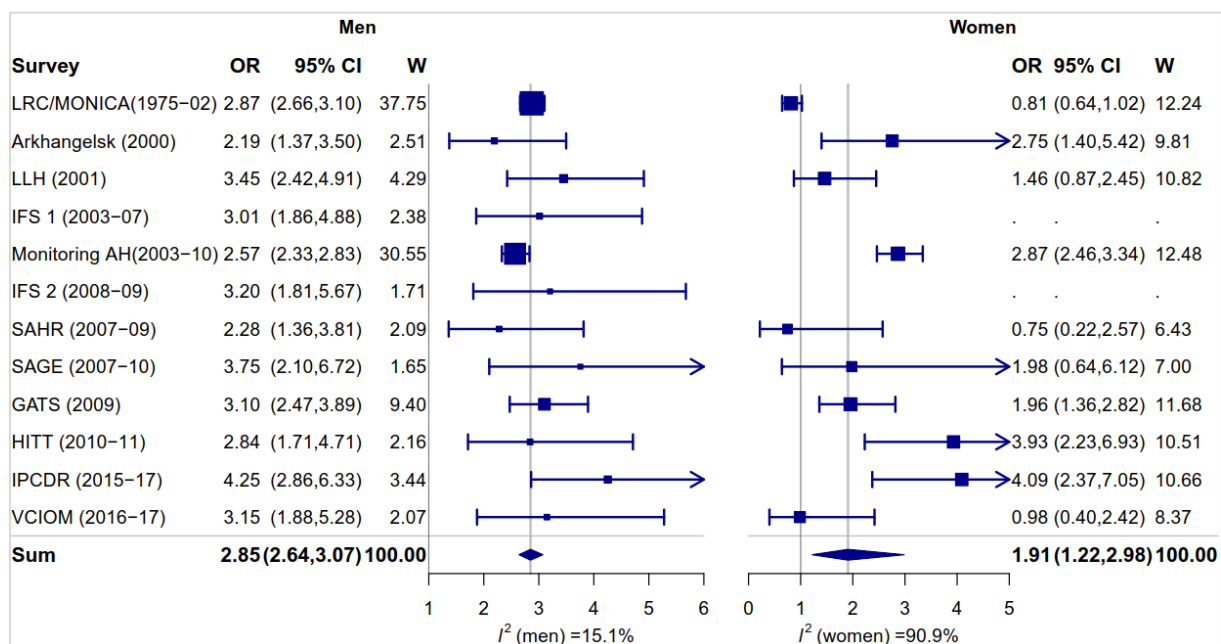

Supplement: MOESM5 [file 17824048]
